# Supplementary material for: Molecular insights into the gating mechanisms of voltage-gated calcium channel CaV2.3
Source: PubMed Central journal article supplement (PMC9889812; doi:10.1038/s41467-023-36260-2), 2023-01-31
Supplement: 41467_2023_36260_MOESM1_ESM.pdf [file 41467_2023_36260_MOESM1_ESM.pdf]

Supplementary information for

[Molecular insights into the gating mechanisms of voltage-gated calcium channel Cav2.3](#)

Yiwei Gao, Shuai Xu, Xiaoli Cui, Hao Xu, Yunlong Qiu, Yiqing Wei, Yanli Dong, Boling Zhu, Chao Peng, Shiqi Liu, Xuejun Cai Zhang, Jianyuan Sun, Zhuo Huang, and Yan Zhao

This document contains Supplementary Figure 1–8 and Supplementary Table 1 and 2.

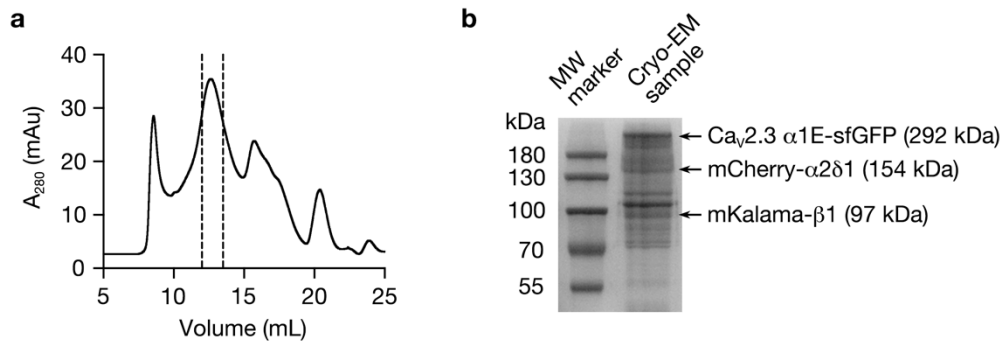

Supplementary Figure 1. Protein purification of the  $Ca_v2.3$ - $\alpha2\delta1$ - $\beta1$  complex

**a.** Size-exclusion chromatogram of the purified protein sample of  $Ca_v2.3$  complex. Peak fractions marked within the dashed lines were pooled and concentrated for the cryo-EM studies. **b.** Coomassie blue-stained SDS-PAGE gel of the purified  $Ca_v2.3$  complex. Bands representing the  $Ca_v2.3$   $\alpha1E$ ,  $\alpha2\delta1$ , and  $\beta1$  subunits were labeled. The experiments were repeated independently for more than 3 times with identical results.

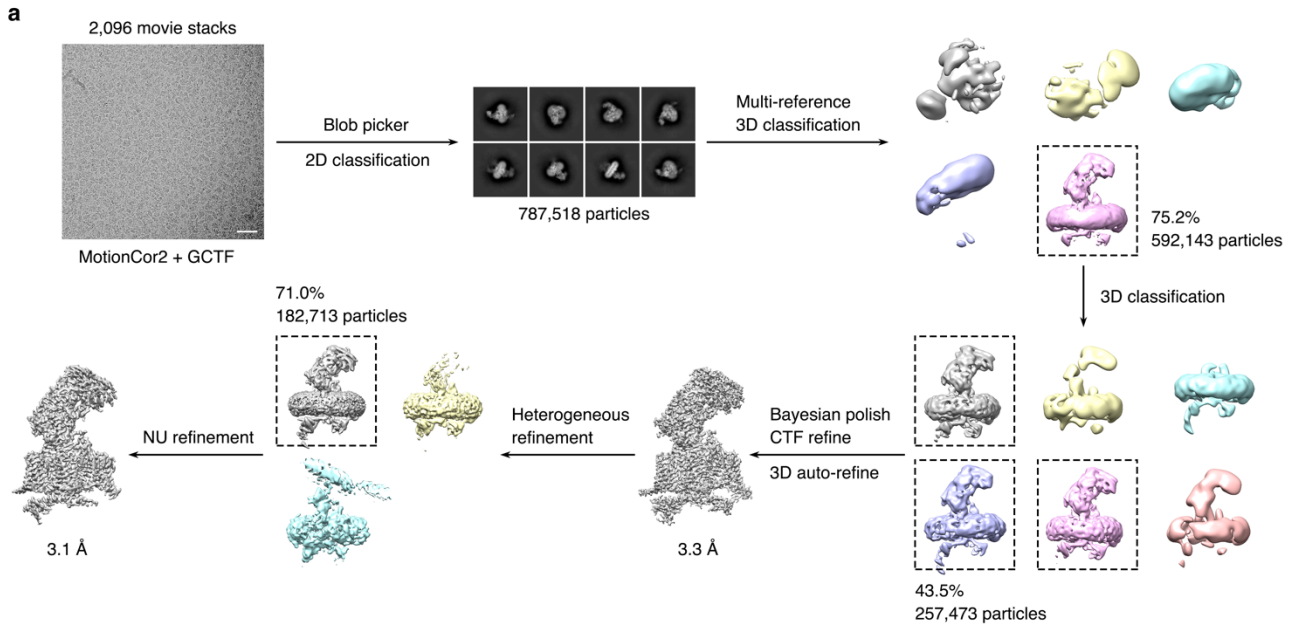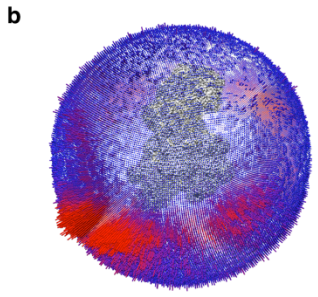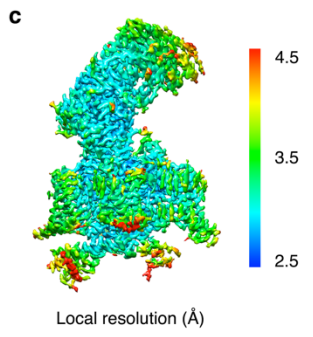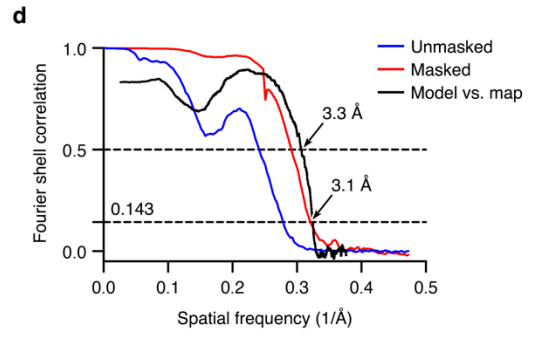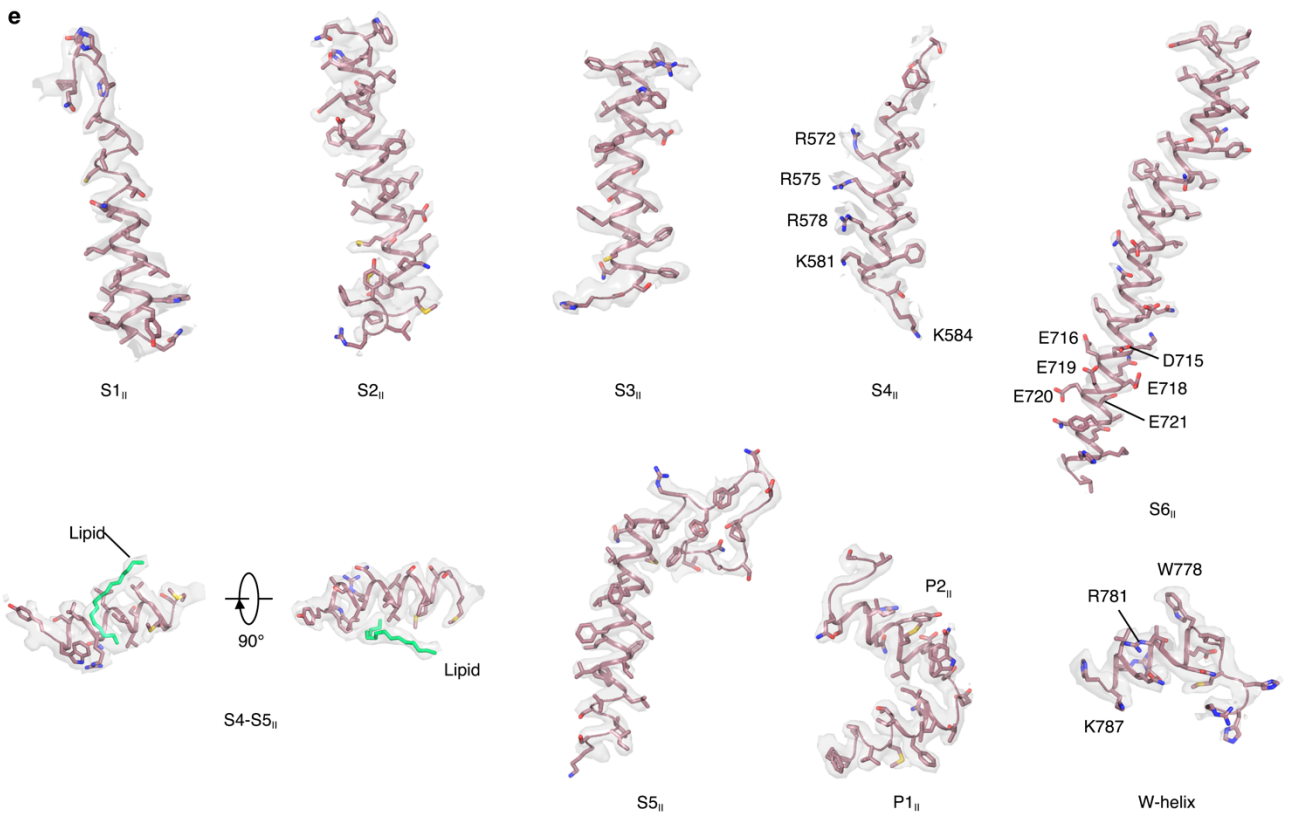

## Supplementary Figure 2. Cryo-EM data processing of the Ca<sub>v</sub>2.3- $\alpha$ 2 $\delta$ 1- $\beta$ 1 complex

**a.** Flow chart of cryo-EM data processing. A total of 787,518 particles were picked from 2,096 micrographs. A representative motion-corrected micrograph of the dataset was shown here (bar = 400 Å). A round of multi-reference 3D classification, and a further round of 3D classification against a single starting reference were performed to clean particles, followed by Bayesian polish and contrast transfer function (CTF) refinement to improve the map quality. Heterologous refinement and non-uniform (NU) refinement generated the final map, which was reported at 3.1 Å according to the golden-standard *Fourier* shell correlation (GSFSC) criterion. **b.** Angular distribution of the particles contributing to the final 3D reconstruction. The height of each spike indicated the number of particles in each designated orientation. **c.** Sharpened map of the Ca<sub>v</sub>2.3 complex, colored according to the estimated value of local resolution. **d.** *Fourier* shell correlations (FSC) curves of the Ca<sub>v</sub>2.3 complex and its atomic model. The unmasked (blue) and masked (red) FSC of the Ca<sub>v</sub>2.3 EM map was calculated between two independently refined half-maps before and after post-processing. The model-vs-map FSC (black) was calculated between the full map and the atomic model. **e.** Representative cryo-EM density map (transparent grey surface) of the Domain II. Residues on the S4<sub>II</sub>, S6<sub>II</sub><sup>NCD</sup> and W-helix were labeled. The lipid molecule residing near the S4-S5<sub>II</sub> was colored green and also indicated.

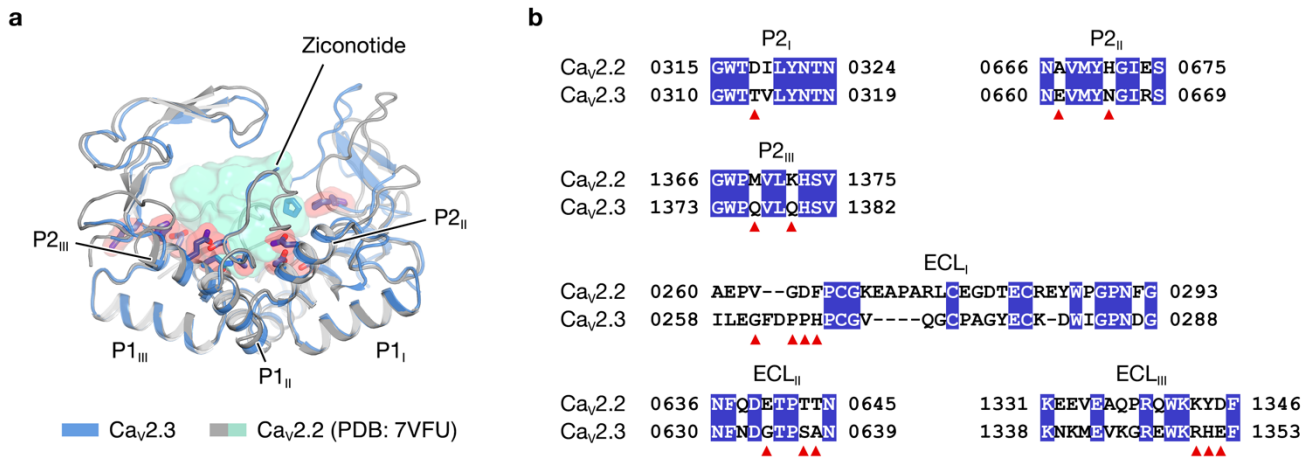

Supplementary Figure 3. Structural analysis of the ziconotide resistance of Ca<sub>v</sub>2.3

**a.** Putative structural mismatches between the Ca<sub>v</sub>2.3 and ziconotide. Extracellular helices (ECLs) and the P-loops (P1 and P2) of the Ca<sub>v</sub>2.3 (blue) are superimposed on the corresponding structures of the ziconotide-bound Ca<sub>v</sub>2.2. The ziconotide is shown as transparent green surface. Non-conserved residues that may contribute to the structural mismatch between Ca<sub>v</sub>2.3 and ziconotide are shown as sticks, overlaid by red surfaces, and indicated in **(b)**. **b.** Sequences alignments between Ca<sub>v</sub>2.3 and Ca<sub>v</sub>2.2 at the P-loops and ECLs. Conserved residues are highlighted in blue. Non-conserved residues that form close contact with ziconotide in Ca<sub>v</sub>2.2 are indicated using red triangles.

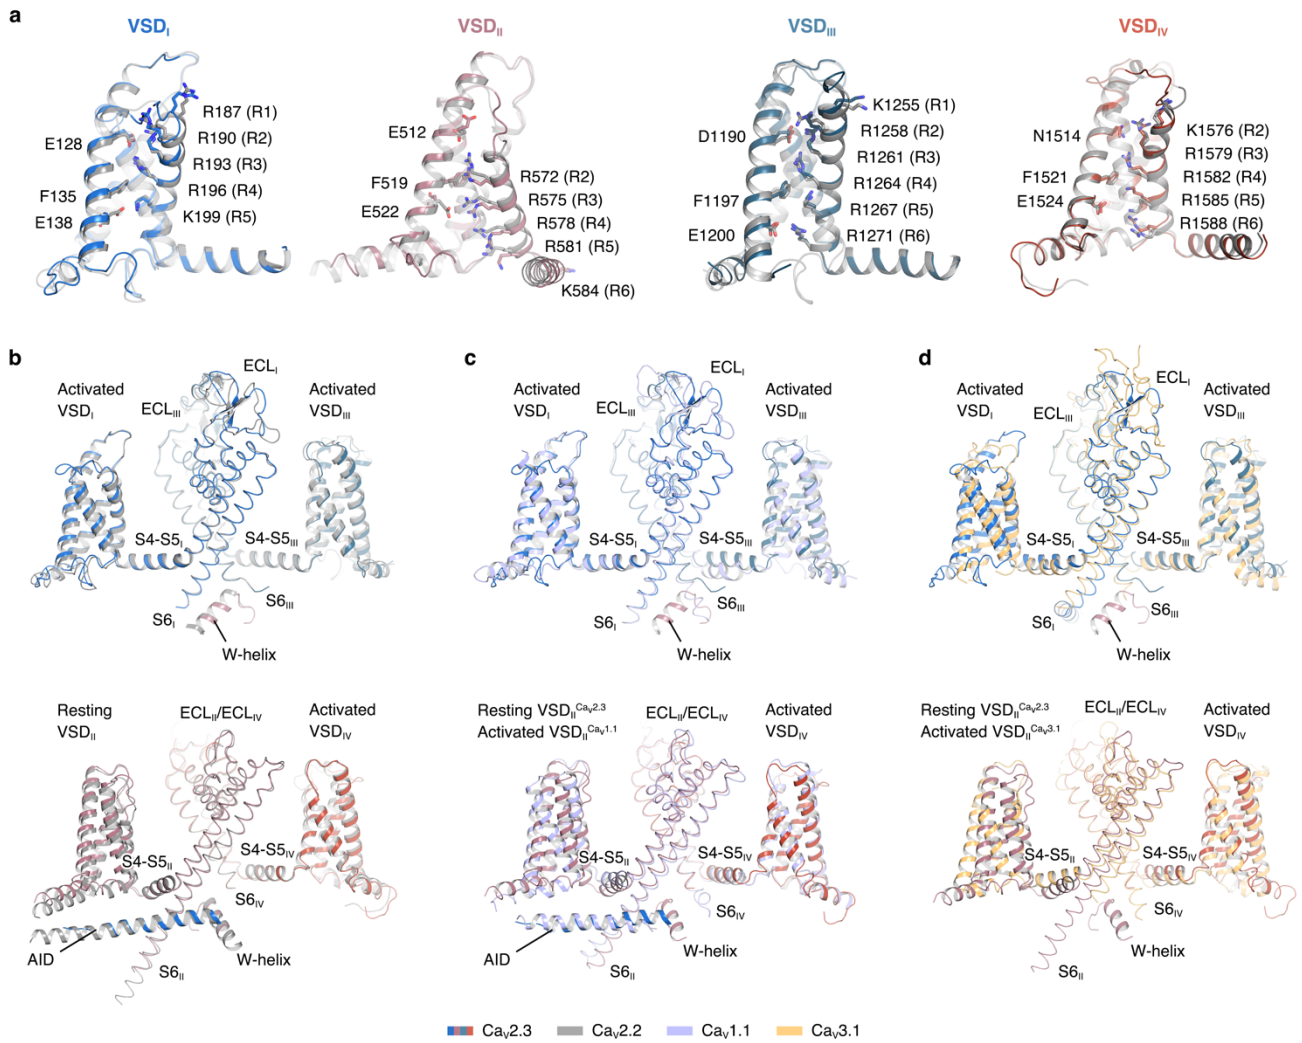

Supplementary Figure 4. VSDs among the Ca<sub>v</sub> structures

Superimpositions of the voltage-sensing domains (VSDs) or pore domains between Ca<sub>v</sub>2.3 and Ca<sub>v</sub>2.2 (**a–b**), Ca<sub>v</sub>1.1 (**c**) or Ca<sub>v</sub>3.1 (**d**). The VSDs were shown as cartoon, and pore domain as loops. Four domains of Ca<sub>v</sub>2.3 was colored blue, pink, deep cyan, and red, respectively. The Ca<sub>v</sub>1.1, Ca<sub>v</sub>2.2, and Ca<sub>v</sub>3.1 was colored light purple, gray, and yellow, respectively.

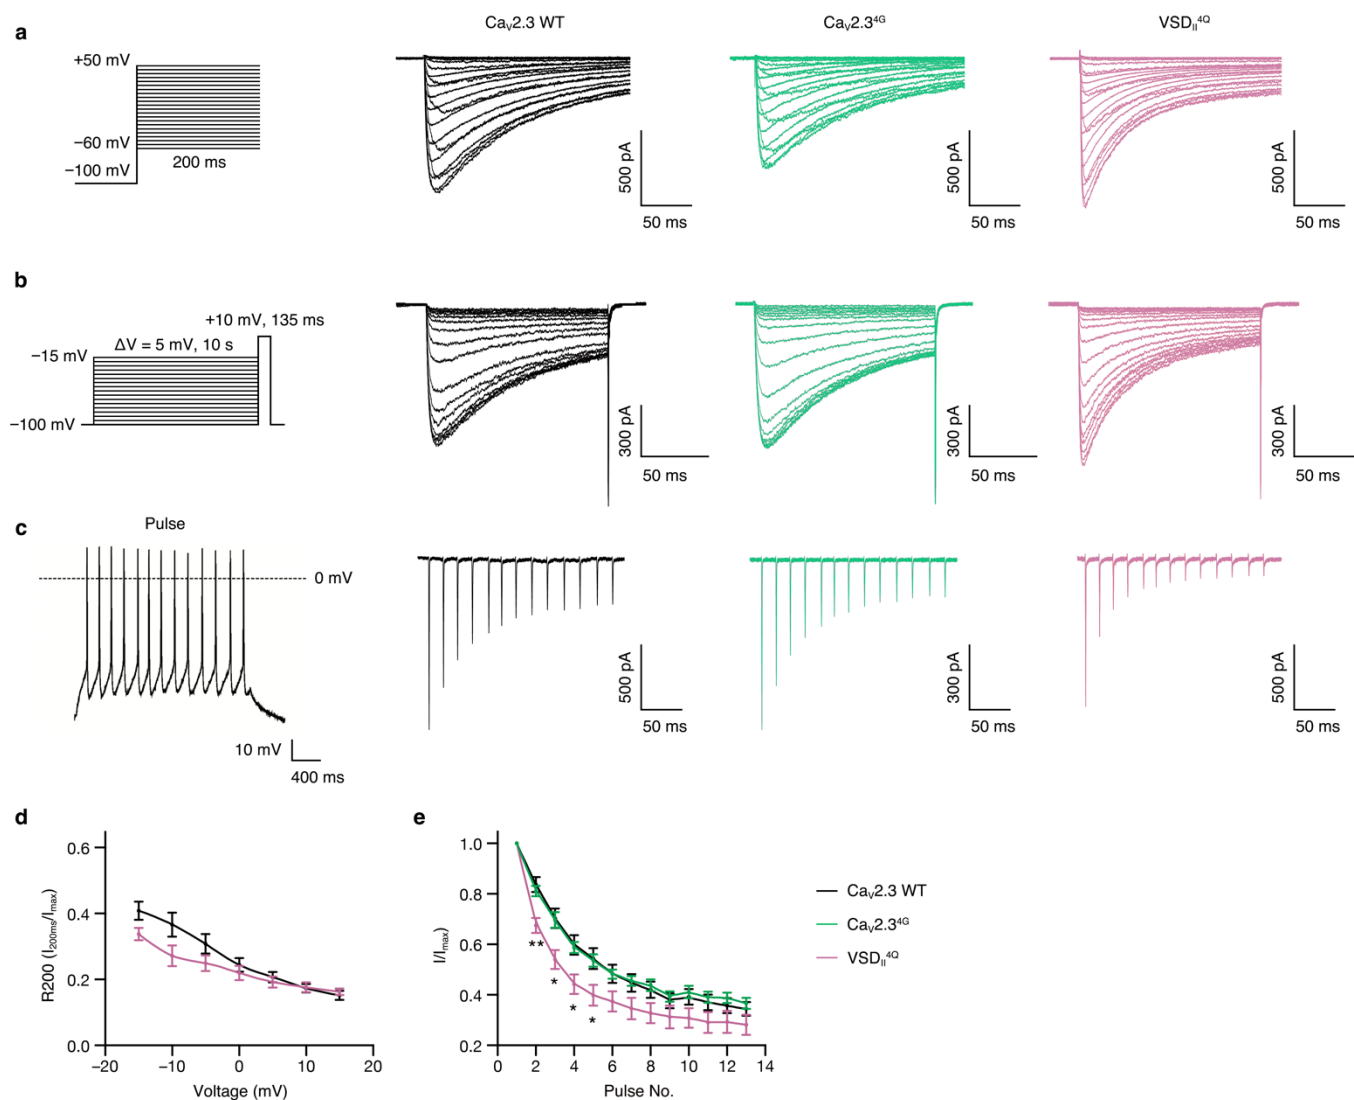

Supplementary Figure 5. Representative whole-cell current traces for VSD-related mutants

Voltage-clamp protocols (left) and representative current traces for electrophysiological studies on the voltage-sensing domains (VSDs). **a**. Protocol and representative whole-cell voltage-clamp Ca<sub>v</sub>2.3 currents (activation curves). Current traces were obtained from a series of 200-ms voltage steps from -60 mV to +50 mV, in 5-mV increments. Ratio of open-state inactivation (R200) were measured using 200-ms test pulses at +10 mV. **b**. Protocols and representative currents for inactivation curves. Currents were elicited by a +10-mV test pulse after holding-voltages from -100 mV to -15 mV, in 5-mV increments. **c**. Representative current responses stimulated by action potential (AP) trains (left). The AP trains were recorded using a whole-cell current-clamp from a mouse hippocampal CA1 pyramidal neuron after current injection (see Method section for the literature reference). **d**. R200 analysis of the mutants. Ca<sub>v</sub>2.3 WT (black), n = 10; VSD<sub>II</sub><sup>4Q</sup> (pink), n = 7. **e**. Inactivation ratio of the mutants quantified using the current density (I) elicited by each spike of AP trains divided by the maximum current (I<sub>max</sub>) elicited by the first spike. Ca<sub>v</sub>2.3 WT (black), n = 13; Ca<sub>v</sub>2.3<sup>4G</sup> (green), n = 7; VSD<sub>II</sub><sup>4Q</sup> (pink), n = 8. Significances were determined using two-sided, unpaired *t*-test. P values, Ca<sub>v</sub>2.3 WT vs. VSD<sub>II</sub><sup>4Q</sup>; 0.002 (No. 2), 0.01 (No. 3), 0.02 (No. 4), and 0.03 (No. 5). Data are presented as mean ± SEM. n, biological independent cells.

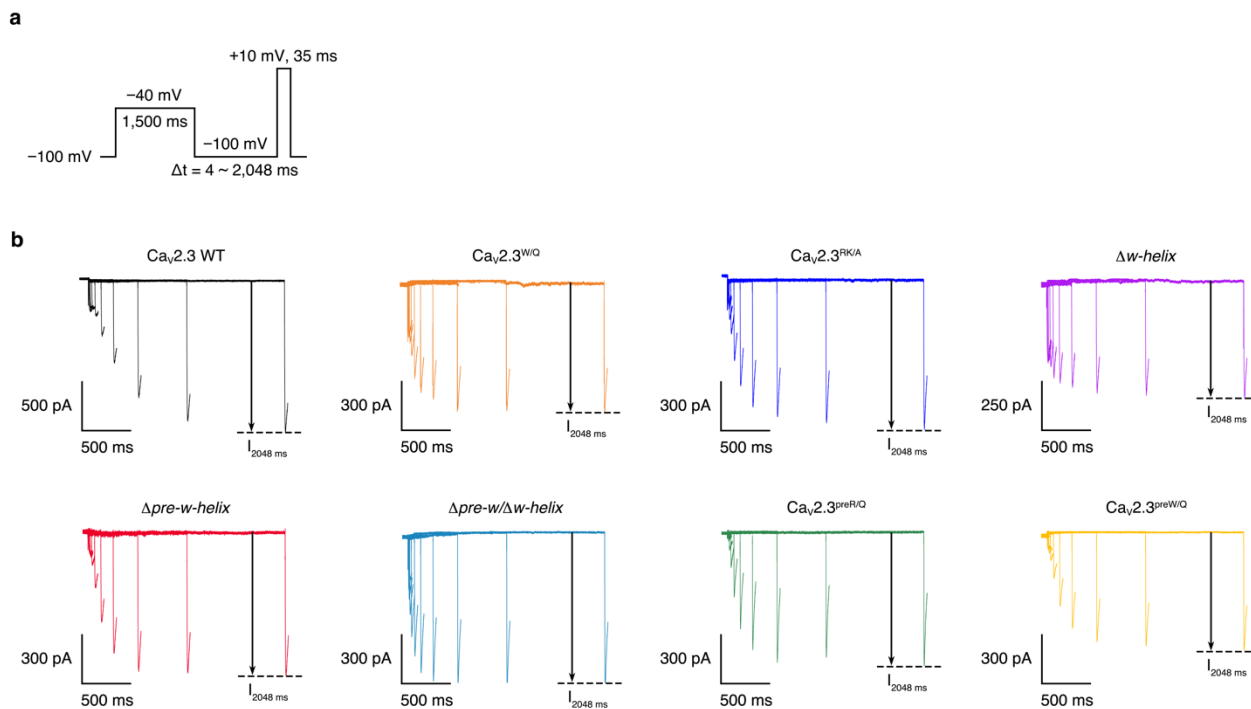

Supplementary Figure 6. Representative whole-cell current traces for CSI-related mutants

Voltage-clamp protocol (**a**) and representative current traces (**b**) of the electrophysiological studies on the recovery rate from closed-state inactivation (CSI). HEK 293-T cells expressing  $Ca_v2.3$  complex were depolarized using a  $-40$  mV pre-pulse for 1,500 ms to inactivate the channels. A recovery hyperpolarization steps to  $-100$  mV were subsequently applied for the indicated period (4–2,048 ms), followed by a 35-ms test pulse at  $+10$  mV.



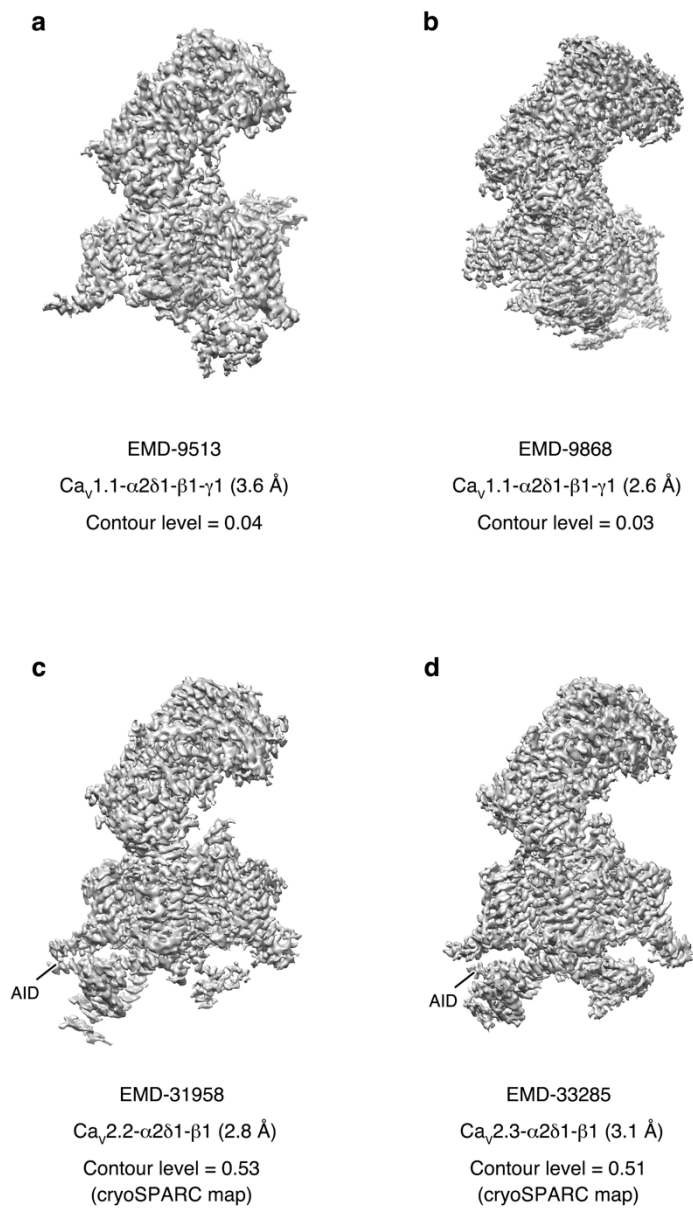

**Supplementary Figure 7. Conformation heterogeneity of the AID**

The alpha-interacting domains (AIDs) adopts a highly-dynamic conformation in the Ca<sub>v</sub>1.1 structures (**a–b**) while were stabilized near the membrane plane in the intracellular side of the Ca<sub>v</sub>2.2 structure (**c**) and the Ca<sub>v</sub>2.3 structure (**d**) resolved in this study. The EM maps were shown as grey surfaces. Densities representing AIDs were labeled.

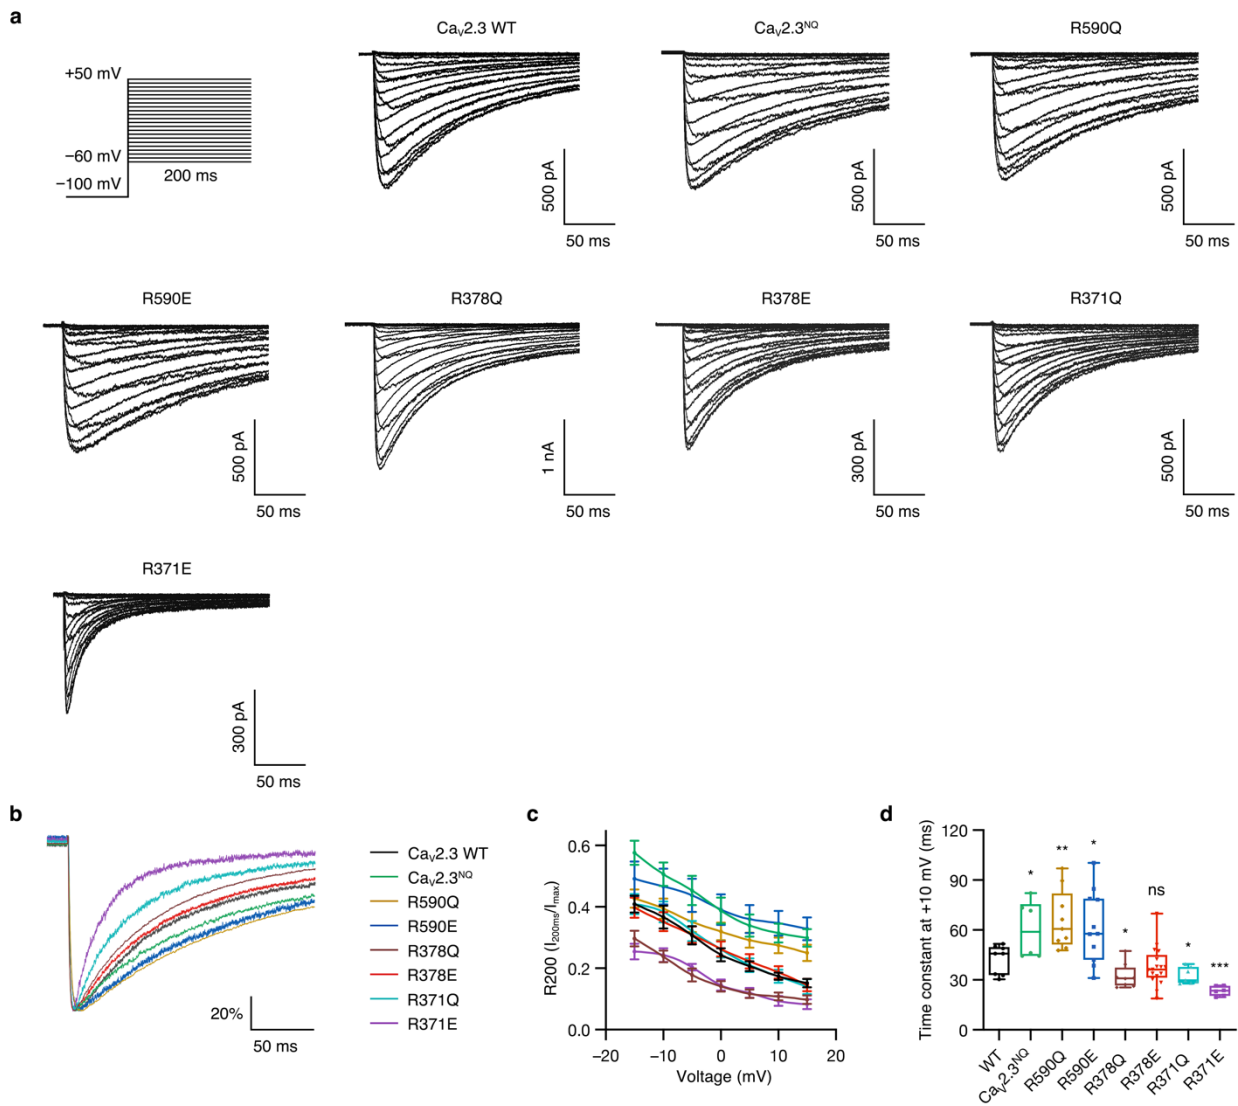

Supplementary Figure 8. Representative whole-cell current traces for OSI-related mutants

**a.** Voltage-clamp protocols and representative whole-cell current traces for electrophysiological studies on open-state inactivation (OSI). Current traces were obtained from a series of 200-ms voltage steps from  $-60$  mV to  $+50$  mV, in 5-mV increments. **b.** Representative whole-cell current traces of the OSI-related mutants under 200-ms test pulses at  $+10$  mV. **c.** Ratio of OSI (R200) under the test pulse series ranging from  $-15$  mV to  $15$  mV, measured using the current at the end of the 200-ms test pulse divided by the peak amplitude. Ca<sub>v</sub>2.3 WT,  $n = 10$ ; Ca<sub>v</sub>2.3<sup>N<sup>Q</sup></sup>,  $n = 10$ ; R590Q,  $n = 10$ ; R590E,  $n = 6$ ; R378Q,  $n = 9$ ; R378E,  $n = 10$ ; R371Q,  $n = 9$ ; R371E,  $n = 7$ . Data are presented as mean  $\pm$  SEM. **d.** Single-term exponential fitting of the current traces under 200-ms test pulses at  $+10$  mV. Data are plotted as box plots. The box encompasses the interquartile range (25th–75th percentile). Whiskers illustrates the minima and maxima of the values. Mean values and medians are indicated using plus signs and dashes, respectively. Ca<sub>v</sub>2.3 WT,  $n = 8$ ; Ca<sub>v</sub>2.3<sup>N<sup>Q</sup></sup>,  $n = 6$ ; R590Q,  $n = 9$ ; R590E,  $n = 11$ ; R378Q,  $n = 8$ ; R378E,  $n = 17$ ; R371Q,  $n = 7$ ; R371E,  $n = 6$ . Significances were determined using two-sided, unpaired  $t$ -test. P values, Ca<sub>v</sub>2.3 WT vs. mutants; 0.02 (Ca<sub>v</sub>2.3<sup>N<sup>Q</sup></sup>), 0.003 (R590Q), 0.03 (R590E), 0.03 (R378Q), 0.02 (R371Q), and 0.0003 (R371E).  $n$ , biological independent cells.

**Supplementary Table 1.****Cryo-EM data collection, refinement, and validation statistics**

---

|  |                                                                       |
|--|-----------------------------------------------------------------------|
|  | Cav2.3- $\alpha$ 2 $\delta$ 1- $\beta$ 1<br>(EMD-33285)<br>(PDB 7XLQ) |
|--|-----------------------------------------------------------------------|

---

|                                                     |             |
|-----------------------------------------------------|-------------|
| <b>Data collection and processing</b>               |             |
| Magnification                                       | ×130,000    |
| Voltage (kV)                                        | 300         |
| Electron exposure (e <sup>-</sup> /Å <sup>2</sup> ) | 60          |
| Defocus range (μm)                                  | -1.2 – -2.2 |
| Pixel size (Å)                                      | 1.04        |
| Symmetry imposed                                    | C1          |
| Initial particle images (no.)                       | 787,518     |
| Final particle images (no.)                         | 257,473     |
| Map resolution (Å)                                  | 3.1         |
| FSC threshold                                       | 0.143       |
| Map resolution range (Å)                            | 2.5 – 4.5   |
| <b>Refinement</b>                                   |             |
| Initial model used (PDB code)                       | 7VFS        |
| Model resolution (Å)                                | 3.3         |
| FSC threshold                                       | 0.5         |
| Map sharpening <i>B</i> factor (Å <sup>2</sup> )    | -94.7       |
| Model composition                                   |             |
| Non-hydrogen atoms                                  | 20,247      |
| Protein residues                                    | 2,436       |
| Ligands                                             | 36          |
| <i>B</i> factors (Å <sup>2</sup> )                  |             |
| Protein                                             | 67.32       |
| Ligand                                              | 53.85       |
| R.m.s. deviations                                   |             |
| Bond lengths (Å)                                    | 0.006       |
| Bond angles (°)                                     | 0.805       |
| Validation                                          |             |
| MolProbity score                                    | 2.03        |
| Clashscore                                          | 10.84       |
| Poor rotamers (%)                                   | 0.23        |
| Ramachandran plot                                   |             |
| Favored (%)                                         | 92.38       |
| Allowed (%)                                         | 7.58        |
| Disallowed (%)                                      | 0.04        |

---

**Supplementary Table 2. Primers used in this study**

| Name                               | Sequence                                          |
|------------------------------------|---------------------------------------------------|
| Cav2.3-F                           | atggctcgcttcggggaggcgg                            |
| Cav2.3-R                           | gcattgtcatcttctccgtgcacttag                       |
| Cav2.3 <sup>4G</sup> -F            | tgtgagggtggcgggtggcgcaccatcagggcagaacgagaa        |
| Cav2.3 <sup>4G</sup> -R            | gatggtgcgccaccgccaccctcacagcccttccccaa            |
| VSD <sub>II</sub> <sup>4Q</sup> -F | tccAgcttctaCAaatattCAaataaccaagtattgggtcc         |
| VSD <sub>II</sub> <sup>4Q</sup> -R | aatattTGtagaagcTggagggtTgcaagacactgattcc          |
| delta-w-helix-F                    | gagcggaggcgcagatgtccagccaggaggccctca              |
| delta-w-helix-R                    | cctggctggacatctgcatgcgctccgctccctcaggtggctg       |
| delta-pre-w-helix-F                | aagagacagaaggcggcggcaccacatgtccgtgaggagca         |
| delta-pre-w-helix-R                | gtgccggcgcctctgtctctttcgatcgaaggcatgtggg          |
| delta-pre-w/w-helix-F              | agagacagaaggagaatgcagatgtccagccaggaggccctc        |
| delta-pre-w/w-helix-R              | gacatctgcattctccttctgtctctttcgatcgaaggcatg        |
| Cav2.3 <sup>W/Q</sup> (W778Q)-F    | acatgtccgtgCAGgagcagcgtaccagccagctgaggaagca       |
| Cav2.3 <sup>W/Q</sup> (W778Q)-R    | gctgtccTGcacggacatgtggtgccggcgc                   |
| Cav2.3 <sup>PreW/Q</sup> (W759Q)-F | tcgatgCAGgagccacgcagcagcc                         |
| Cav2.3 <sup>PreW/Q</sup> (W759Q)-R | gtggctccTGcatcgacatgtggtgtct                      |
| Cav2.3 <sup>RK/A</sup> -F          | agcagGCtaccagccagctgGCgGCgcacatgcagatgtccag       |
| Cav2.3 <sup>RK/A</sup> -R          | tgcGCcGCcagctggctggtaGCctgctcccacacggacatgtgg     |
| Cav2.3 <sup>PreR/Q</sup> -F        | tgtgggagccacAGagcagccacctgCAGgagCAGaggcggcgg      |
| Cav2.3 <sup>PreR/Q</sup> -R        | aggtggctgctCTgtggctcccacatcgacatgtggtgtTGtctccttc |
| Cav2.3 <sup>NQ</sup> -F            | aactgaccaagAatAATcagAATAACAATAACgccc              |
| Cav2.3 <sup>NQ</sup> -R            | TctgATTatTcttggcagttcctgggctgg                    |
| R590E-F                            | tccctaGAaattgggtgtctccttgat                       |
| R590E-R                            | ccaaattcTCtagggaagcccaataactg                     |
| R590Q-F                            | tccctaCAaattgggtgtctccttgat                       |
| R590Q-R                            | ccaaattcTGtagggaagcccaataactg                     |
| R371E-F                            | tcatgaagctgGAgcggcagcagcagat                      |
| R371E-R                            | gcgcTCcagctcatgaaagccctcg                         |
| R371Q-F                            | tcatgaagctgCAGcggcagcagcagat                      |
| R371Q-R                            | gcgcTGcagctcatgaaagccctcg                         |
| R378E-F                            | gattgagGAAgagctgaatggctaccgtgc                    |
| R378E-R                            | tcagctcTTCctcaatctgctgctgg                        |
| R378Q-F                            | gattgagCAAgagctgaatggctaccgtgc                    |
| R378Q-R                            | tcagctcTTGctcaatctgctgctgg                        |
